# Supplementary material for: Association Between Triglyceride-Glucose Index and 28-Day Mortality in Patients with Sepsis and Heart Failure: A Retrospective Study Using the MIMIC-IV Database.
Source: Research Square preprint supplement (doi:10.21203/rs.3.rs-5401476/v1), 2024-12-17
Supplement: Supplementary file 1 [file 85c73565f9abc0d88139a6e9.docx]

Supplement.Table 1. ICD-9 and ICD-10 Codes for Heart Failure Classification

| International Classification of Diseases version | icd_code |
| --- | --- |
| Icd9 | 39891, 40201, 40211, 40291, 40401, 40403, 40411, 40413, 40491, 40493, 4280, 4281, 42820, 42821, 42822, 42823, 42830, 42831, 42832, 42833, 42840, 42841, 42842, 42843, 4289, |
| Icd10 | I0981, I110, I130, I132, I50, I502, I5020, I5021, I5022, I5023, I503, I5030, I5031, I5032, I5033, I504, I5040, I5041, I5042, I5043, I508, I5081, I50810, I50811, I50812, I50813, I50814, I5082, I5083, I5084, I5089, I509, I9713, I97130, I97131 |

Supplement.Table 2. Subgroup analysis of TyG-BMI index and 28 days mortality in Septic Heart Failure patients

| subgroups | All Case | Total | Q1 | | Q2 | | | Q3 | | | P for Interaction |
| --- | --- | --- | --- | --- | --- | --- | --- | --- | --- | --- | --- |
| Case |  | Case | HR(95%CI) | P value | Case | HR(95%CI) | P value |
| Gender |  |  |  |  |  |  |  |  |  |  | 0.324 |
| Male | 119 | 360 | 50 | ref | 38 | 0.63 (0.39, 1.03) | 0.064 | 31 | 0.55 (0.31, 0.95) | 0.033 |  |
| Female | 93 | 234 | 29 | ref | 29 | 0.95 (0.55, 1.65) | 0.854 | 28 | 0.73 (0.40, 1.35) | 0.321 |  |
| Age |  |  |  |  |  |  |  |  |  |  | 0.121 |
| ≥60 | 184 | 450 | 81 | ref | 56 | 0.75 (0.52, 1.08) | 0.124 | 47 | 0.65 (0.42, 0.98) | 0.042 |  |
| ＜60 | 28 | 144 | 5 | ref | 11 | 1.51 (0.40, 5.69) | 0.542 | 12 | 1.72 (0.35, 8.42) | 0.504 |  |
| Hypertension |  |  |  |  |  |  |  |  |  |  | 0.177 |
| YES | 165 | 439 | 68 | ref | 51 | 0.75 (0.51, 1.12) | 0.161 | 46 | 0.57 (0.37, 0.88) | 0.011 |  |
| NO | 47 | 155 | 18 | ref | 16 | 1.77 (0.63, 4.98) | 0.278 | 13 | 1.34 (0.44, 4.05) | 0.602 |  |
| Atrial Fibrillation |  |  |  |  |  |  |  |  |  |  | 0.925 |
| YES | 49 | 119 | 23 | ref | 15 | 0.80 (0.34, 1.85) | 0.601 | 11 | 0.44 (0.15, 1.31) | 0.139 |  |
| NO | 163 | 475 | 63 | ref | 52 | 0.74 (0.49, 1.12) | 0.151 | 48 | 0.67 (0.43, 1.04) | 0.073 |  |
| Type 2 Diabetes |  |  |  |  |  |  |  |  |  |  | 0.397 |
| YES | 75 | 215 | 18 | ref | 28 | 0.94 (0.46, 1.90) | 0.859 | 29 | 0.95 (0.46, 1.95) | 0.893 |  |
| NO | 137 | 379 | 68 | ref | 39 | 0.79 (0.52, 1.21) | 0.277 | 30 | 0.68 (0.41, 1.13) | 0.138 |  |
| CHD |  |  |  |  |  |  |  |  |  |  | 0.355 |
| YES | 93 | 259 | 42 | ref | 29 | 0.57 (0.32, 1.00) | 0.051 | 22 | 0.60 (0.31, 1.15) | 0.121 |  |
| NO | 119 | 335 | 44 | ref | 38 | 0.85 (0.52, 1.37) | 0.494 | 37 | 0.72 (0.42, 1.22) | 0.223 |  |
| Stroke |  |  |  |  |  |  |  |  |  |  | 0.563 |
| YES | 57 | 120 | 26 | ref | 20 | 0.96 (0.44, 2.09) | 0.910 | 11 | 0.76 (0.29, 1.95) | 0.566 |  |
| NO | 115 | 474 | 20 | ref | 47 | 0.78 (0.52, 1.18) | 0.234 | 48 | 0.66 (0.42, 1.04) | 0.075 |  |
| Septic Shock |  |  |  |  |  |  |  |  |  |  | 0.594 |
| YES | 90 | 190 | 28 | ref | 31 | 0.85 (0.46, 1.58) | 0.609 | 31 | 0.66 (0.33, 1.32) | 0.241 |  |
| NO | 122 | 404 | 58 | ref | 36 | 0.77 (0.49, 1.21) | 0.258 | 28 | 0.55 (0.33, 0.92) | 0.023 |  |

HR hazard ratio, CI confidence interval, CHD coronary heart disease, AF atrial fibrillation, COPD chronic obstructive pulmonary disease, CKD chronic kidney disease, ACEI/ARB angiotensin-converting enzyme inhibitor or angiotensin receptor blocker.

Supplement Table 3. Nonlinear Relationship Between TyG-BMI Index and 28-Day Mortality in Septic Heart Failure Patients Based on RCS Analysis

| Item | BK.HR | P |
| --- | --- | --- |
| E_BK1 | 94.793 (87.864 ,101.721) |  |
| slope1 | 0.62 (0.431,0.892) | 0.0101 |
| slope2 | 0.9971 (0.9935,1.0007) | 0.117 |
| Likelihood Ratio test |  | 0.442 |
| Non-linear Test*1 | - | 0.82 |
| Non-linear Test*2 | - | 0.352 |
